# Supplementary material for: Dietary Behavior and Determinants of Diet Quality among Primary Health Care Patients in Poland
Source: MDPI journal article supplement (doi:10.3390/nu16070925), 2024-03-23
Supplement: s1 [file s1]

**Table S1.** Characteristics of DQS (Dietary Quality Score).

| Food            | Frequency                             | Score    |
|-----------------|---------------------------------------|----------|
| Vegetables      | >5 servings/week                      | 2 points |
|                 | 2-5 servings/week                     | 1 point  |
|                 | <2 servings/week                      | 0 point  |
| Fruit           | >3 pieces/day                         | 2 points |
|                 | >3 pieces/week and <2 pieces/day      | 1 point  |
|                 | <3 pieces/week                        | 0 point  |
| Fish            | >200 g/week                           | 2 points |
|                 | <200 g/week                           | 1 point  |
|                 | No intake                             | 0 point  |
| Fat             | None                                  | 2 points |
| Fat, spread     | Vegetable margarine                   | 1 point  |
|                 | Butter, blended spread, lard          | 0 point  |
| Fat, cooking    | None/olive oil                        | 2 points |
|                 | Vegetable margarine, oil              | 1 point  |
|                 | Margarine/butter/blended spread/ lard | 0 point  |
| Fat, summarized | 6 points, summarized                  | 2 points |
|                 | 3-5 points, summarized                | 1 point  |
|                 | 2 points, summarized                  | 0 point  |

**Table S2.** DQS categories

| Category                 | Score      |
|--------------------------|------------|
| Unhealthy dietary habits | 0-3 points |
| Average dietary habits   | 4-6 points |
| Healthy dietary habits   | 7-8 points |
